# Supplementary material for: A genotype-phenotype correlation matrix for ABCA4 disease based on long-term prognostic outcomes
Source: JCI journal article supplement (doi:10.1172/jci.insight.156154), 2021-12-07
Supplement: sd2 [file 2]

You are being redirected.
